# Supplementary material for: Revisiting the five-decade-old structure of the Fe2WO6 powder with incommensurate modulations
Source: Royal Society of Chemistry journal article supplement (doi:10.1039/d1ce00916h), 2021-01-01
Supplement: d1ce00916h2.pdf [file d1ce00916h2.pdf]

## Revisiting the five-decade-old structure of the $\text{Fe}_2\text{WO}_6$ powder with incommensurate modulations

Eric QUAREZ <sup>1,\*</sup>, Julio César ESPINOSA-ANGELES <sup>1,2</sup>, Olivier CROSNIER <sup>1,2</sup>, Olivier JOUBERT <sup>1</sup>  
and Thierry BROUSSE <sup>1,2</sup>

<sup>1</sup> Université de Nantes, CNRS, Institut des Matériaux Jean Rouxel, IMN, F-44000 Nantes,  
France

<sup>2</sup> Réseau sur le Stockage Electrochimique de l'énergie (RS2E), FR CNRS 3459, CEDEX, 80039  
Amiens, France

\* Corresponding Author: [eric.quarez@cnsr-immn.fr](mailto:eric.quarez@cnsr-immn.fr)

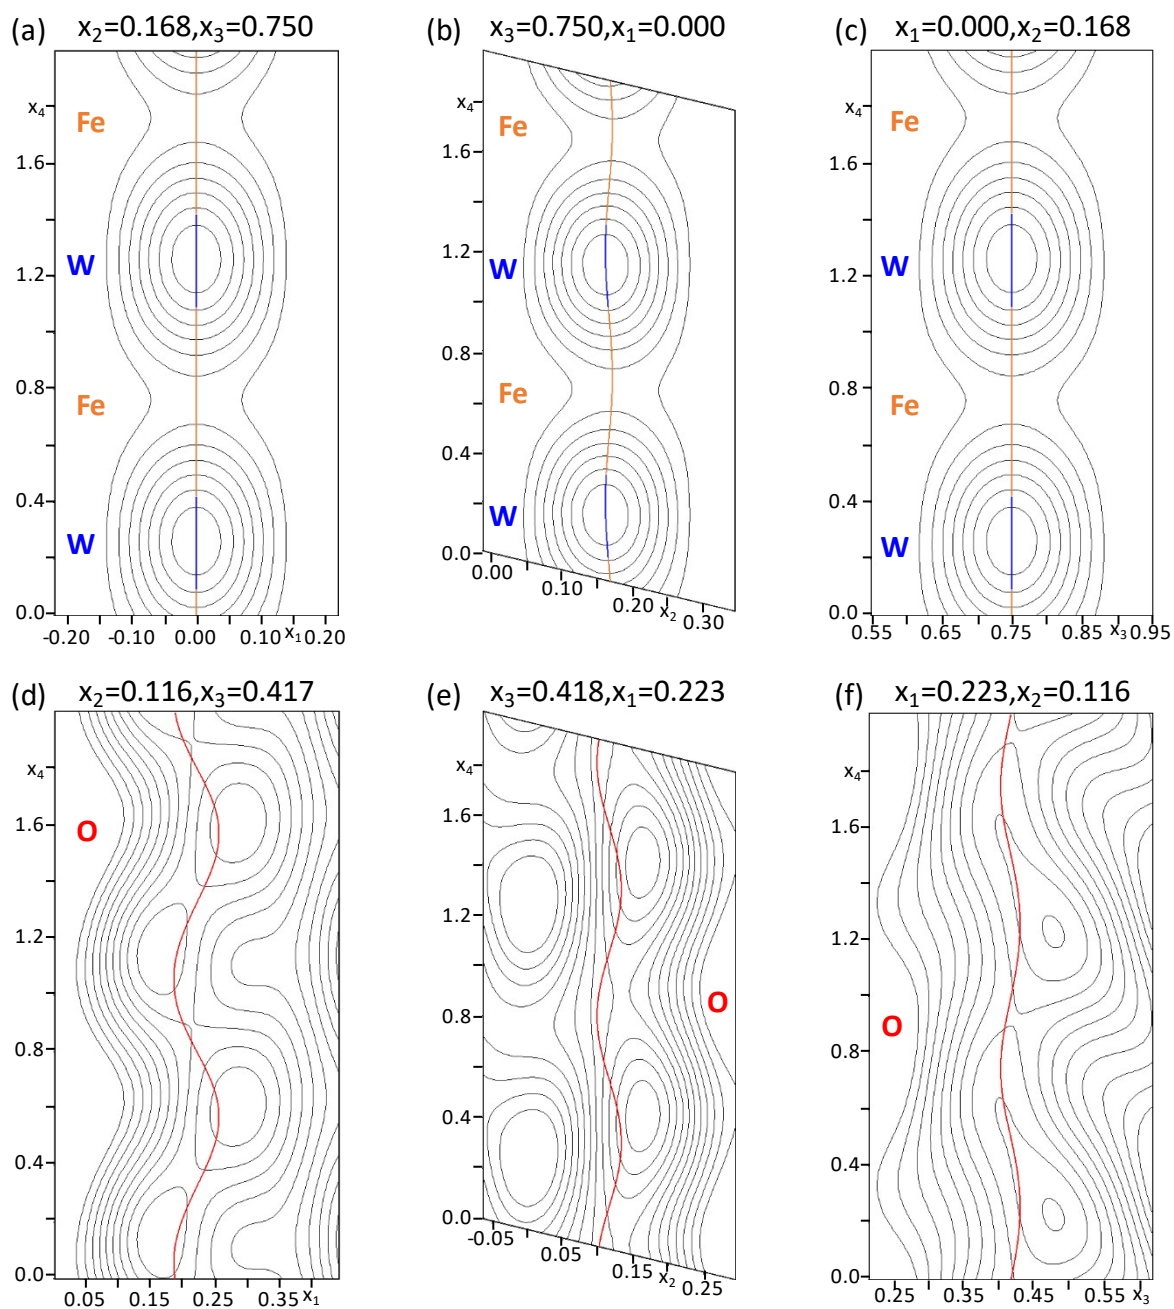

Figure S1. De Wolff  $x_1$ - $x_4$ ,  $x_2$ - $x_4$  and  $x_3$ - $x_4$  sections showing the occupational and positional modulations of Fe, W and O in  $\text{Fe}_2\text{WO}_6$  ceramic sample as a function of the internal  $x_4$  axis calculated in the vicinity of the atomic position ( $x_1 = x$ ,  $x_2 = y$ ,  $x_3 = z$ ). The central colored lines correspond to the calculated atomic positions (orange: Fe; blue: W, red: O).

Table S1. Selected interatomic distances (Å) and bond valence sums (BVS) in the modulated structure of Fe<sub>2</sub>WO<sub>6</sub> ceramic sample.

|                       | Average  | Minimum | Maximum |
|-----------------------|----------|---------|---------|
| Fe1-O1 <sup>i</sup>   | 2.01(2)  | 1.87(3) | 2.08(3) |
| Fe1-O1 <sup>ii</sup>  | 1.99(2)  | 1.84(3) | 2.08(3) |
| Fe1-O1 <sup>iii</sup> | 2.01(2)  | 1.87(3) | 2.08(3) |
| Fe1-O1 <sup>iv</sup>  | 1.99(2)  | 1.84(3) | 2.08(3) |
| Fe1-O1 <sup>v</sup>   | 2.13(3)  | 1.97(3) | 2.22(3) |
| Fe1-O1 <sup>vi</sup>  | 2.13(3)  | 1.97(3) | 2.22(3) |
| W1-O1 <sup>i</sup>    | 1.88(2)  | 1.85(3) | 1.95(3) |
| W1-O1 <sup>ii</sup>   | 1.83(2)  | 1.80(3) | 1.91(3) |
| W1-O1 <sup>iii</sup>  | 1.88(2)  | 1.85(3) | 1.95(3) |
| W1-O1 <sup>iv</sup>   | 1.83(2)  | 1.80(3) | 1.91(3) |
| W1-O1 <sup>v</sup>    | 1.94(2)  | 1.91(3) | 2.00(3) |
| W1-O1 <sup>vi</sup>   | 1.94(2)  | 1.91(3) | 2.00(3) |
| BVS Fe1               | 2.902(7) | 2.33(2) | 3.97(2) |
| BVS W1                | 6.57(3)  | 5.78(2) | 7.03(2) |
| BVS O1                | 2.063(8) | 1.67(2) | 2.44(2) |

Symmetry codes: (i)  $x_1, x_2, x_3, x_4$ ; (ii)  $-x_1+1/2, -x_2+1/2, x_3+1/2, -x_4$ ; (iii)  $-x_1, x_2, -x_3+3/2, x_4$ ; (iv)  $x_1-1/2, -x_2+1/2, -x_3+1, -x_4$ ; (v)  $-x_1, -x_2, -x_3+1, -x_4$ ; (vi)  $x_1, -x_2, x_3+1/2, -x_4$ .
